# Supplementary material for: Synthesis and optical properties of sulfur-containing monomers and cyclomatrix polyphosphazenes
Source: Royal Society of Chemistry journal article supplement (doi:10.1039/b926069b), 2010-01-01
Supplement: b926069b.pdf [file b926069b.pdf]

## Supplementary Information

for

### **Cyclomatrix Polyphosphazenes by the Opening of Sulfur-containing Spiro Rings: Monomer Synthesis, Polymerization, and Optical Properties.**

**Toshiki Fushimi<sup>1</sup> and Harry R. Allcock<sup>2\*</sup>**

<sup>1</sup>*Department of Research and Development, Fushimi Pharmaceutical Co., Ltd., 1676  
Nakatsu Cho, Marugame, 763-8605, Japan*

<sup>2</sup>*Department of Chemistry, Pennsylvania State University, University Park,  
Pennsylvania 16802, USA*

\*Corresponding Author. E-mail address: hra@chem.psu.edu

The details of single crystal x-ray crystallography of **1**, **2**, **3**, and **4** are provided in the following Tables. The molecular structure of **1**, **2**, and **3** determined by single crystal x-ray crystallography are shown in the following Figures. Disordered atoms were found in the difference Fourier maps of **2** and **4**. The occupancy for each disordered atom was refined initially, and was fixed at the final refinement run. The C7 atom in **2** showed large thermal motion due to disorder. The two hydrogen atoms on C4 in **4** were seen in the difference Fourier map and were placed at the very end of the refinement.

**Table 1S.** Crystallographic data collection and structure refinement parameters for  $\text{N}_3\text{P}_3\text{Cl}_4(\text{NHCH}_2\text{CH}_2\text{S})$ .

|                                                   |                                                               |
|---------------------------------------------------|---------------------------------------------------------------|
| Empirical formula                                 | $\text{C}_2\text{H}_5\text{Cl}_4\text{N}_4\text{P}_3\text{S}$ |
| Formula weight                                    | 351.87                                                        |
| Temperature / K                                   | 298(2)                                                        |
| Crystal system                                    | Monoclinic                                                    |
| Space group                                       | $\text{P}2(1)/n$                                              |
| $a / \text{\AA}$                                  | 14.2552(13)                                                   |
| $b / \text{\AA}$                                  | 6.0436(6)                                                     |
| $c / \text{\AA}$                                  | 15.5469(14)                                                   |
| $\alpha / \text{deg}$                             | 90                                                            |
| $\beta / \text{deg}$                              | 113.376(2)                                                    |
| $\gamma / \text{deg}$                             | 90                                                            |
| Volume / $\text{\AA}^3$                           | 1229.5(2)                                                     |
| Z                                                 | 4                                                             |
| Density (calculated) / $\text{g cm}^{-3}$         | 1.901                                                         |
| Absorption coefficient / $\text{mm}^{-1}$         | 1.490                                                         |
| F(000)                                            | 696                                                           |
| Crystal size / $\text{mm}^3$                      | $0.19 \times 0.09 \times 0.07$                                |
| Theta range for data collection / deg             | From 1.64 to 28.25                                            |
| Index ranges                                      | $-18 \leq h \leq 18, -8 \leq k \leq 8, -20 \leq l \leq 19$    |
| Reflections collected                             | 10107                                                         |
| Independent reflections                           | 3006                                                          |
| $R_{\text{int}}$                                  | 0.0251                                                        |
| Completeness to theta = 28.25°                    | 99.0%                                                         |
| Absorption correction                             | Empirical                                                     |
| Ratio of min. and max. transmission               | 0.6839                                                        |
| Refinement method                                 | Full-matrix least-square on $F_2$                             |
| Data                                              | 3006                                                          |
| Restraints                                        | 0                                                             |
| Parameters                                        | 127                                                           |
| Goodness-of-fit on $F^2$                          | 1.073                                                         |
| Final R indices                                   | $R_1 = 0.0681, wR_2 = 0.1899$                                 |
| R indices (all data)                              | $R_1 = 0.0842, wR_2 = 0.2031$                                 |
| Largest diff. peak / $\text{e}^- \text{\AA}^{-3}$ | 1.158                                                         |
| Largest diff. hole / $\text{e}^- \text{\AA}^{-3}$ | -0.806                                                        |

**Table 2S.** Crystallographic data collection and structure refinement parameters for *trans*-N<sub>3</sub>P<sub>3</sub>Cl<sub>2</sub>(NHCH<sub>2</sub>CH<sub>2</sub>S)<sub>2</sub>.

|                                                     |                                                                                             |
|-----------------------------------------------------|---------------------------------------------------------------------------------------------|
| Empirical formula                                   | C <sub>4</sub> H <sub>10</sub> Cl <sub>2</sub> N <sub>5</sub> P <sub>3</sub> S <sub>2</sub> |
| Formula weight                                      | 356.10                                                                                      |
| Temperature / K                                     | 93(2)                                                                                       |
| Crystal system                                      | Monoclinic                                                                                  |
| Space group                                         | P2(1)                                                                                       |
| a / Å                                               | 9.850(2)                                                                                    |
| b / Å                                               | 11.225(2)                                                                                   |
| c / Å                                               | 12.684(3)                                                                                   |
| α / deg                                             | 90                                                                                          |
| β / deg                                             | 100.897(3)                                                                                  |
| γ / deg                                             | 90                                                                                          |
| Volume / Å <sup>3</sup>                             | 1377.2 (5)                                                                                  |
| Z                                                   | 4                                                                                           |
| Density (calculated) / g cm <sup>-3</sup>           | 1.717                                                                                       |
| Absorption coefficient / mm <sup>-1</sup>           | 1.104                                                                                       |
| F(000)                                              | 720                                                                                         |
| Crystal size / mm <sup>3</sup>                      | 0.28 × 0.24 × 0.19                                                                          |
| Theta range for data collection / deg               | From 1.77 to 28.33                                                                          |
| Index ranges                                        | -12 ≤ h ≤ 11, -18 ≤ k ≤ 13, -28 ≤ l ≤ 26                                                    |
| Reflections collected                               | 13157                                                                                       |
| Independent reflections                             | 6658                                                                                        |
| R <sub>int</sub>                                    | 0.0197                                                                                      |
| Completeness to theta = 28.32°                      | 99.7%                                                                                       |
| Absorption correction                               | Empirical                                                                                   |
| Ratio of min. and max. transmission                 | 0.7016                                                                                      |
| Refinement method                                   | Full-matrix least-square on F <sub>2</sub>                                                  |
| Data                                                | 6658                                                                                        |
| Restraints                                          | 1                                                                                           |
| Parameters                                          | 289                                                                                         |
| Goodness-of-fit on F <sup>2</sup>                   | 1.031                                                                                       |
| Final R indices                                     | R1 = 0.0294, wR2 = 0.753                                                                    |
| R indices (all data)                                | R1 = 0.0298, wR2 = 0.756                                                                    |
| Largest diff. peak / e <sup>-</sup> Å <sup>-3</sup> | 0.946                                                                                       |
| Largest diff. hole / e <sup>-</sup> Å <sup>-3</sup> | -0.750                                                                                      |

**Table 3S.** Crystallographic data collection and structure refinement parameters for *cis*-N<sub>3</sub>P<sub>3</sub>Cl<sub>2</sub>(NHCH<sub>2</sub>CH<sub>2</sub>S)<sub>2</sub>.

|                                                     |                                                                                              |
|-----------------------------------------------------|----------------------------------------------------------------------------------------------|
| Empirical formula                                   | C <sub>8</sub> H <sub>20</sub> Cl <sub>4</sub> N <sub>10</sub> P <sub>6</sub> S <sub>4</sub> |
| Formula weight                                      | 712.20                                                                                       |
| Temperature / K                                     | 273(2)                                                                                       |
| Crystal system                                      | Monoclinic                                                                                   |
| Space group                                         | P2(1)/n                                                                                      |
| a / Å                                               | 9.1908(6)                                                                                    |
| b / Å                                               | 13.5389(9)                                                                                   |
| c / Å                                               | 21.8660(15)                                                                                  |
| α / deg                                             | 90                                                                                           |
| β / deg                                             | 94.6750(10)                                                                                  |
| γ / deg                                             | 90                                                                                           |
| Volume / Å <sup>3</sup>                             | 2711.8 (3)                                                                                   |
| Z                                                   | 4                                                                                            |
| Density (calculated) / g cm <sup>-3</sup>           | 1.744                                                                                        |
| Absorption coefficient / mm <sup>-1</sup>           | 1.121                                                                                        |
| F(000)                                              | 1440                                                                                         |
| Crystal size / mm <sup>3</sup>                      | 0.18 × 0.15 × 0.14                                                                           |
| Theta range for data collection / deg               | From 1.77 to 28.33                                                                           |
| Index ranges                                        | -12 ≤ h ≤ 11, -18 ≤ k ≤ 13, -28 ≤ l ≤ 26                                                     |
| Reflections collected                               | 17485                                                                                        |
| Independent reflections                             | 6672                                                                                         |
| R <sub>int</sub>                                    | 0.0207                                                                                       |
| Completeness to theta = 28.33°                      | 98.5%                                                                                        |
| Absorption correction                               | Empirical                                                                                    |
| Ratio of min. and max. transmission                 | 0.8361                                                                                       |
| Refinement method                                   | Full-matrix least-square on F <sub>2</sub>                                                   |
| Data                                                | 6672                                                                                         |
| Restraints                                          | 0                                                                                            |
| Parameters                                          | 289                                                                                          |
| Goodness-of-fit on F <sup>2</sup>                   | 1.032                                                                                        |
| Final R indices                                     | R1 = 0.0380, wR2 = 0.0971                                                                    |
| R indices (all data)                                | R1 = 0.0478, wR2 = 0.1026                                                                    |
| Largest diff. peak / e <sup>-</sup> Å <sup>-3</sup> | 0.620                                                                                        |
| Largest diff. hole / e <sup>-</sup> Å <sup>-3</sup> | -0.520                                                                                       |

**Table 4S.** Crystallographic data collection and structure refinement parameters for *trans*-N<sub>3</sub>P<sub>3</sub>(NHCH<sub>2</sub>CH<sub>2</sub>S)<sub>3</sub>.

|                                                     |                                                                             |
|-----------------------------------------------------|-----------------------------------------------------------------------------|
| Empirical formula                                   | C <sub>6</sub> H <sub>15</sub> N <sub>6</sub> P <sub>3</sub> S <sub>3</sub> |
| Formula weight                                      | 360.31                                                                      |
| Temperature / K                                     | 133(2)                                                                      |
| Crystal system                                      | Orthorhombic                                                                |
| Space group                                         | Pbcn                                                                        |
| a / Å                                               | 11.316(2)                                                                   |
| b / Å                                               | 16.802(4)                                                                   |
| c / Å                                               | 15.148(3)                                                                   |
| α / deg                                             | 90                                                                          |
| β / deg                                             | 90                                                                          |
| γ / deg                                             | 90                                                                          |
| Volume / Å <sup>3</sup>                             | 2880.1(10)                                                                  |
| Z                                                   | 8                                                                           |
| Density (calculated) / g cm <sup>-3</sup>           | 1.653                                                                       |
| Absorption coefficient / mm <sup>-1</sup>           | 0.839                                                                       |
| F(000)                                              | 1472                                                                        |
| Crystal size / mm <sup>3</sup>                      | 0.20 × 0.15 × 0.13                                                          |
| Theta range for data collection / deg               | From 2.17 to 28.30                                                          |
| Index ranges                                        | -15 ≤ h ≤ 15, -22 ≤ k ≤ 22, -19 ≤ l ≤ 20                                    |
| Reflections collected                               | 25831                                                                       |
| Independent reflections                             | 3584                                                                        |
| R <sub>int</sub>                                    | 0.0350                                                                      |
| Completeness to theta = 28.30°                      | 99.9%                                                                       |
| Absorption correction                               | Empirical                                                                   |
| Ratio of min. and max. transmission                 | 0.8503                                                                      |
| Refinement method                                   | Full-matrix least-square on F <sub>2</sub>                                  |
| Data                                                | 3584                                                                        |
| Restraints                                          | 0                                                                           |
| Parameters                                          | 212                                                                         |
| Goodness-of-fit on F <sup>2</sup>                   | 1.268                                                                       |
| Final R indices                                     | R1 = 0.0538, wR2 = 0.1287                                                   |
| R indices (all data)                                | R1 = 0.0584, wR2 = 0.1306                                                   |
| Largest diff. peak / e <sup>-</sup> Å <sup>-3</sup> | 0.545                                                                       |
| Largest diff. hole / e <sup>-</sup> Å <sup>-3</sup> | -0.690                                                                      |

**Figure 1S.** Molecular structure of **1** determined by single crystal X-ray crystallography.

<<<Figure 1S>>>

**Figure 2S.** Molecular structure of **2** determined by single crystal X-ray crystallography.

<<<Figure 2S>>>

**Figure 3S.** Molecular structure of **3** determined by single crystal X-ray crystallography.

<<<Figure 3S>>>
